# Supplementary material
Source: Springer Nature journal article supplement (https://www.springermedizin.de/resource/supplementary/13024_2011_334_MOESM5_ESM.pdf/9643776)

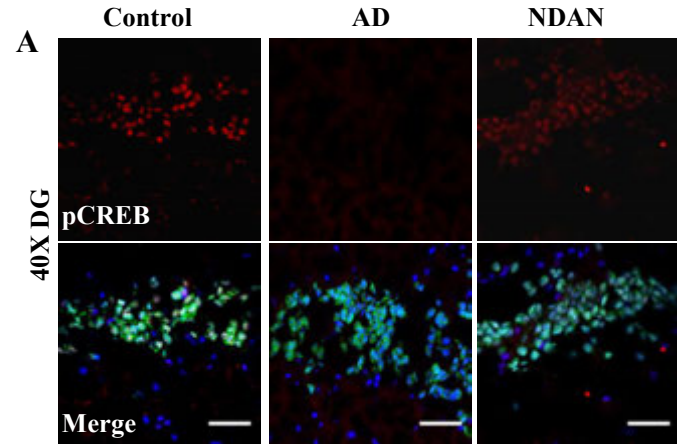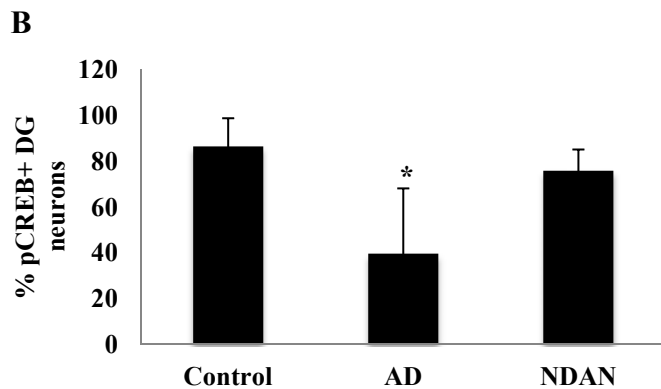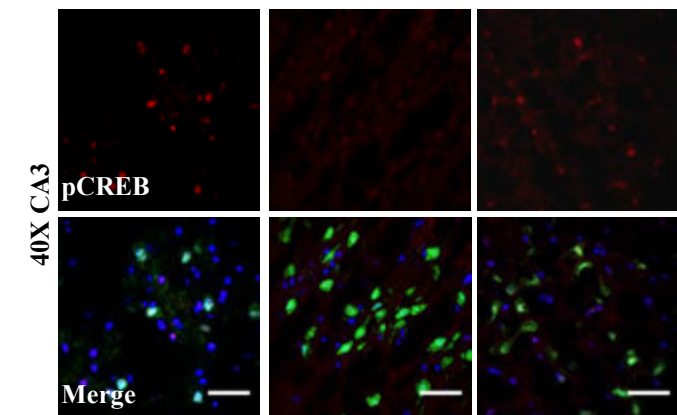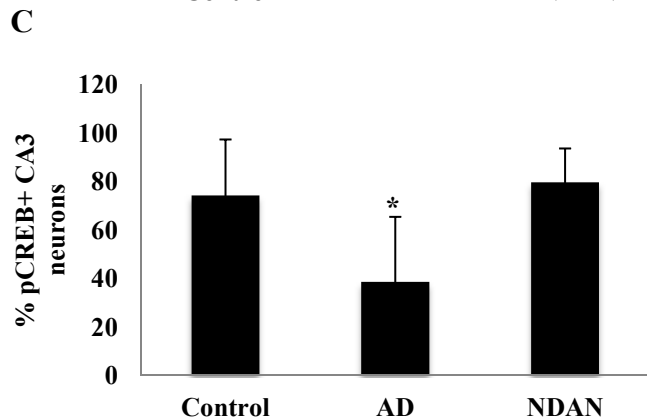

Supplement: MOESM5 [file 9643776]
